# Supplementary material for: Machine learning the ropes: principles, applications and directions in synthetic chemistry
Source: Royal Society of Chemistry journal article supplement (doi:10.1039/c9cs00786e), 2020-01-01
Supplement: c9cs00786e2.csv [file c9cs00786e2.csv]

Alcohol	N_C	N_Bran	P_OH	BP / �C
Methanol	1	0	1	65
Ethanol	2	0	1	78
1-Propanol	3	0	1	97
2-Propanol	3	1	2	82
1-Butanol	4	0	1	118
2-Butanol	4	1	2	100
2-Methyl-1-Propanol	4	1	1	108
2-Methyl-2-Propanol	4	2	3	83
1-Pentanol	5	0	1	138
2-Methyl-1-butanol	5	1	1	129
2-Methylbutan-2-ol	5	2	3	102
3-Methyl-1-butanol	5	1	1	131
3-Methyl-2-butanol	5	2	2	112
2,2-Dimethyl-1-propanol	5	2	1	113
2-Pentanol	5	1	2	119
3-Pentanol	5	1	2	116
1-Hexanol	6	0	1	157
2-Hexanol	6	1	2	140
3-Hexanol	6	1	2	135
2-Methyl-1-pentanol	6	1	1	148
3-Methyl-1-pentanol	6	1	1	152
4-Methyl-1-pentanol	6	1	1	151
2-Methyl-2-pentanol	6	2	3	121
3-Methyl-2-pentanol	6	2	2	134
4-Methyl-2-pentanol	6	2	2	131
2-Methyl-3-pentanol	6	2	2	126
3-Methyl-3-pentanol	6	2	3	122
2,2-Dimethyl-1-butanol	6	2	1	137
2,3-Dimethyl-1-butanol	6	2	1	145
3,3-Dimethyl-1-butanol	6	2	1	143
2,3-Dimethyl-1-butanol	6	2	1	119
3,3-Dimethyl-1-butanol	6	2	1	120
2-Ethyl-1-butanol	6	1	1	148
1-Heptanol	7	0	1	176
2-Heptanol	7	1	2	160
3-Heptanol	7	1	2	156
4-Heptanol	7	1	2	156
1-Octanol	8	0	1	194
2-Octanol	8	1	2	180
3-Octanol	8	1	2	175
4-Octanol	8	1	2	175
2-Ethyl1-hexanol	8	1	1	185
1-Nonanol	9	0	1	214
2-Nonanol	9	1	2	198
3-Nonanol	9	1	2	193
4-Nonanol	9	1	2	194
1-Decanol	10	0	1	233
2-Decanol	10	1	2	211
3-Decanol	10	1	2	213
4-Decanol	10	1	2	211
